# Supplementary material for: A new synthesis and preliminary evaluation of some analogues of mecamylamine – a compound with anti-addiction properties
Source: Royal Society of Chemistry journal article supplement (doi:10.1039/c6ob01974a), 2016-01-01

**A new synthesis and preliminary evaluation of some analogues of  
mecamylamine – a compound with anti-addiction properties.**

David Mangan<sup>a</sup>, Neasa McNabola<sup>a</sup>, Emily Clarke<sup>b</sup>, Isabel Bermudez-Diaz<sup>c</sup>, Susan Wonnacott<sup>b</sup>

and J. Mike Southern<sup>a</sup>

<sup>1</sup>H Spectrum of M

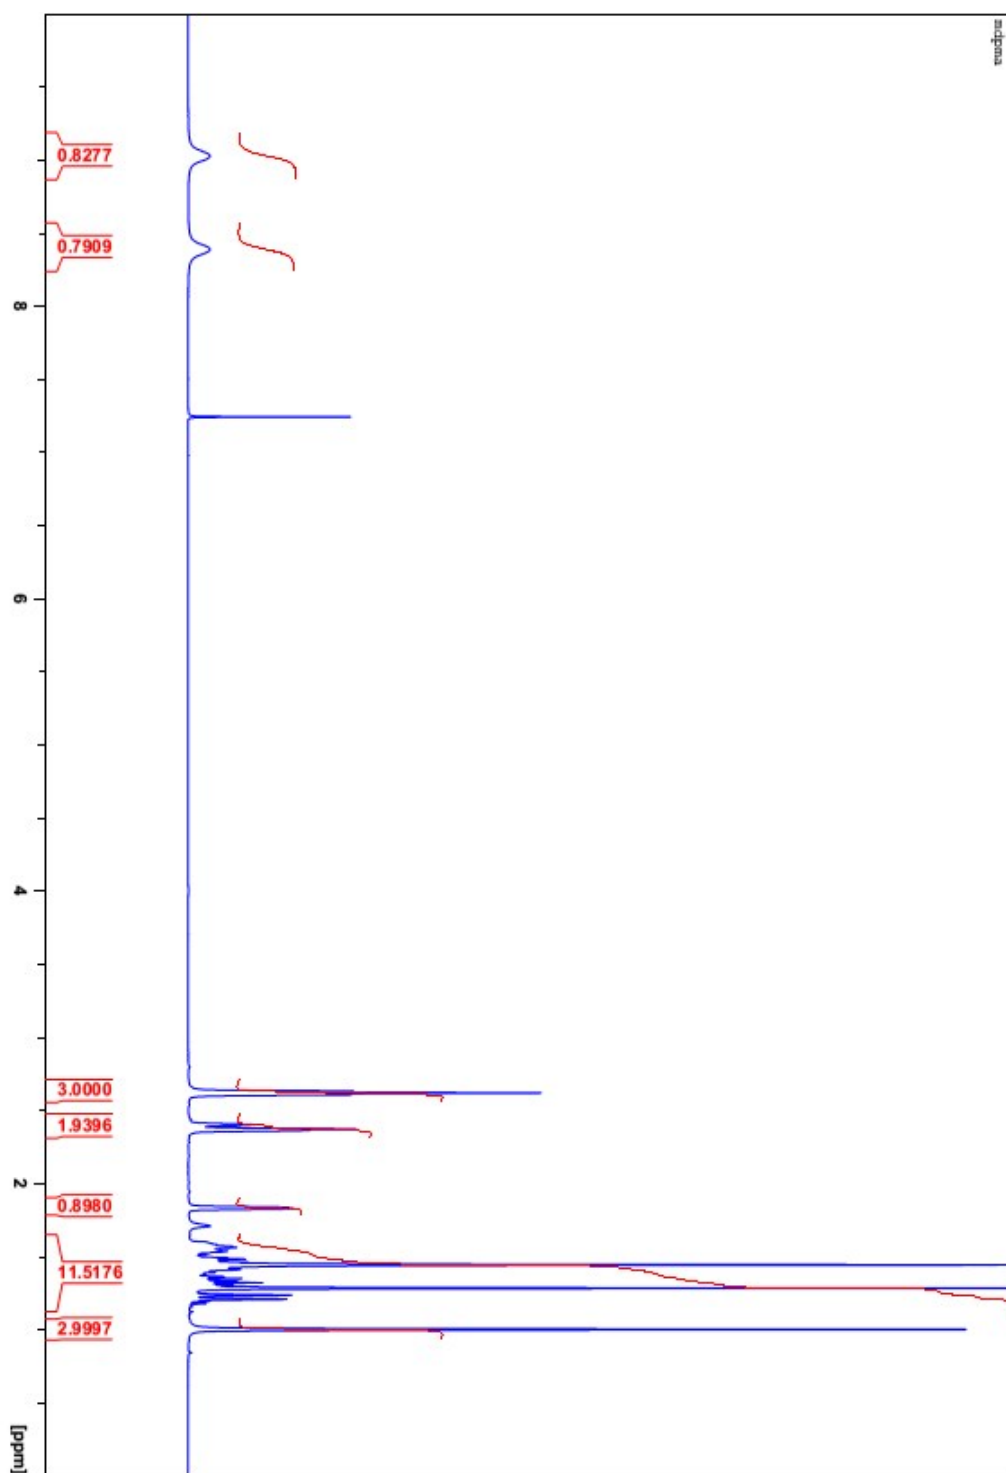

<sup>13</sup>C Spectrum of Mecamylamine.HCl (3.HCl)

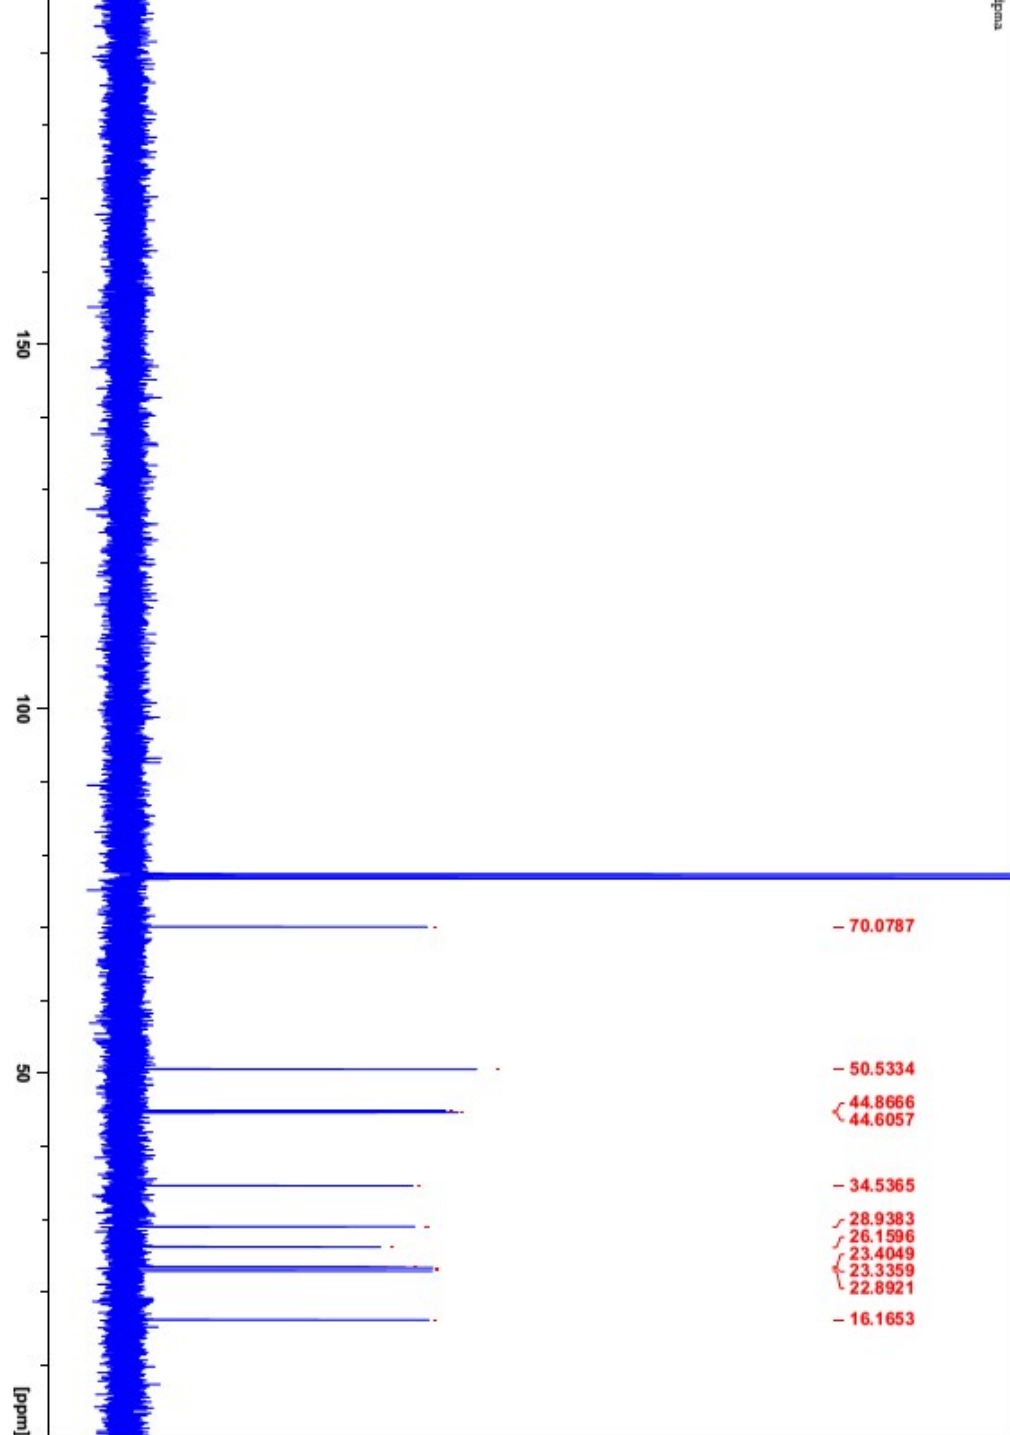

<sup>1</sup>H Spectrum of Compound 6

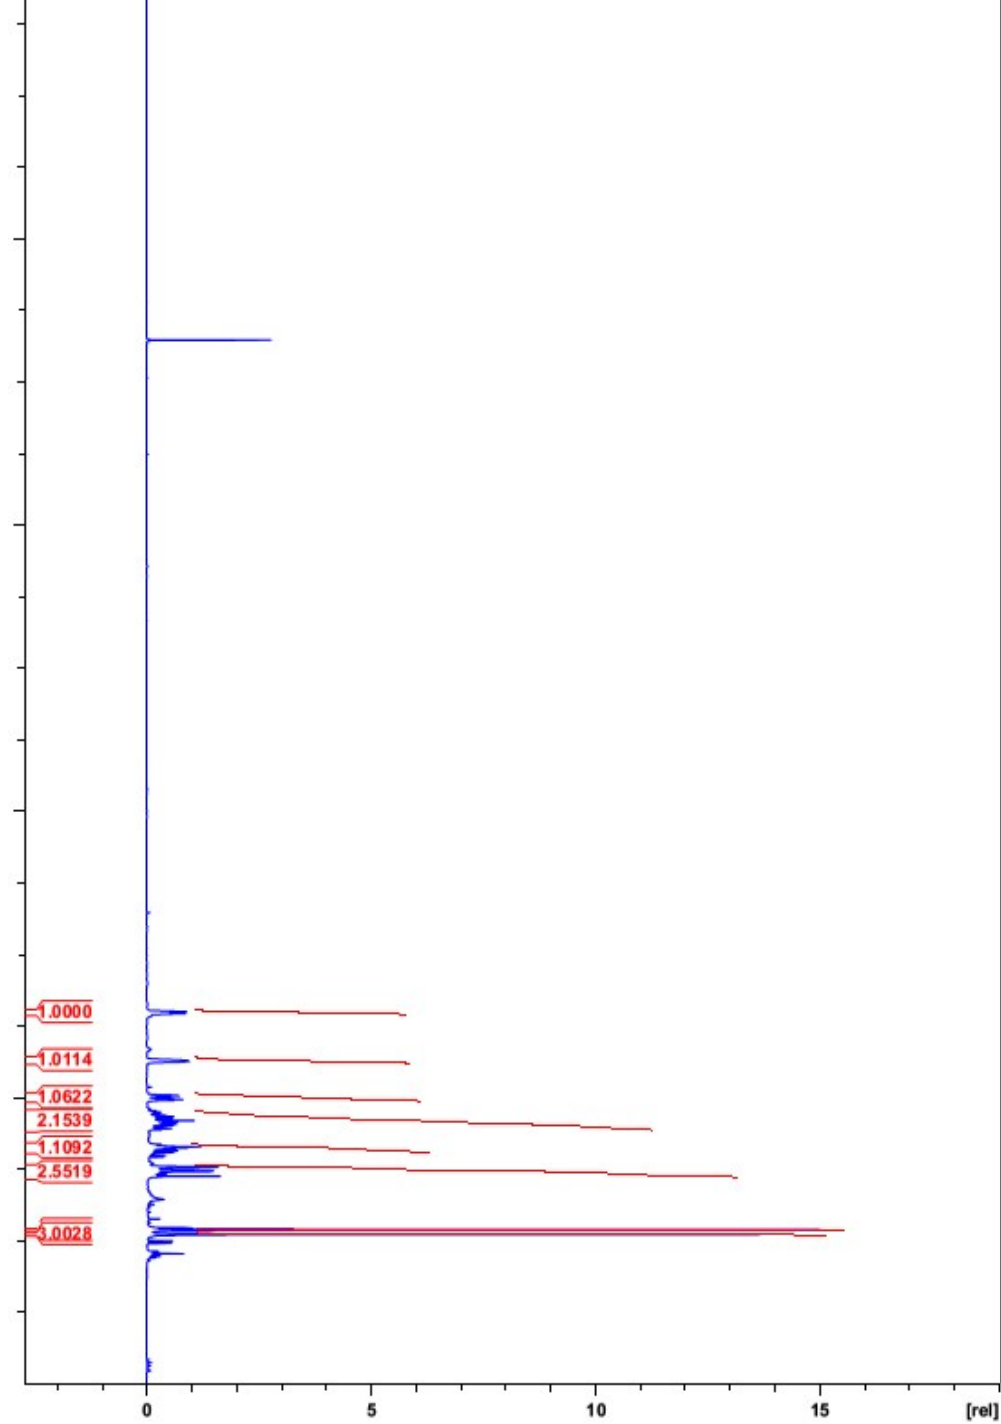

<sup>13</sup>C Spectrum of Compound 6

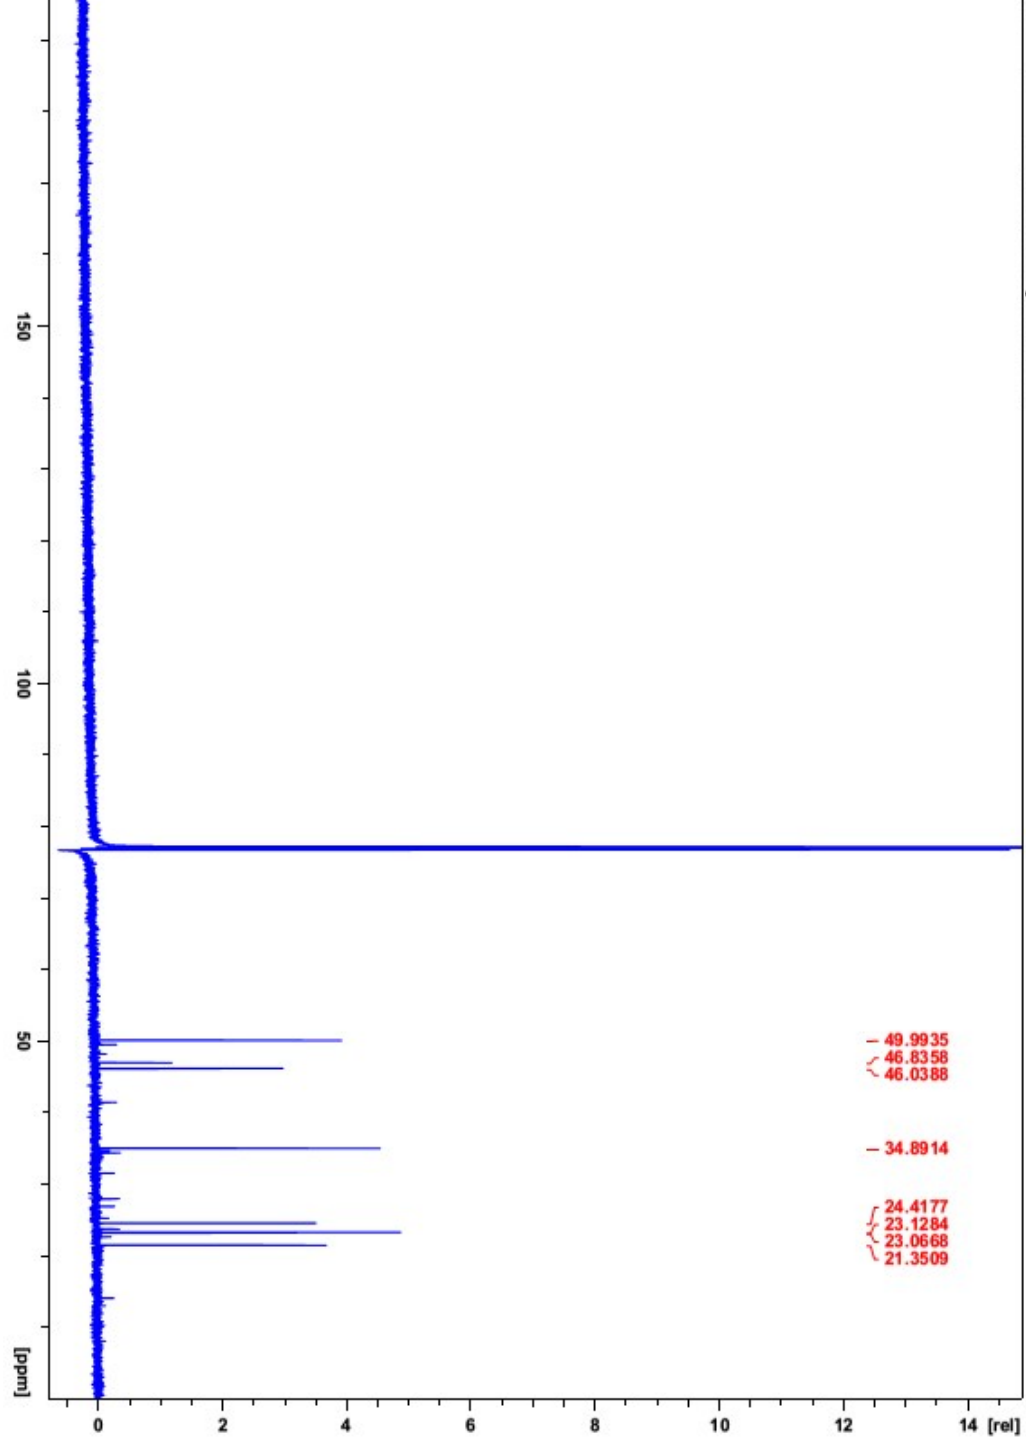

$^1\text{H}$  Spectrum of Compound 7

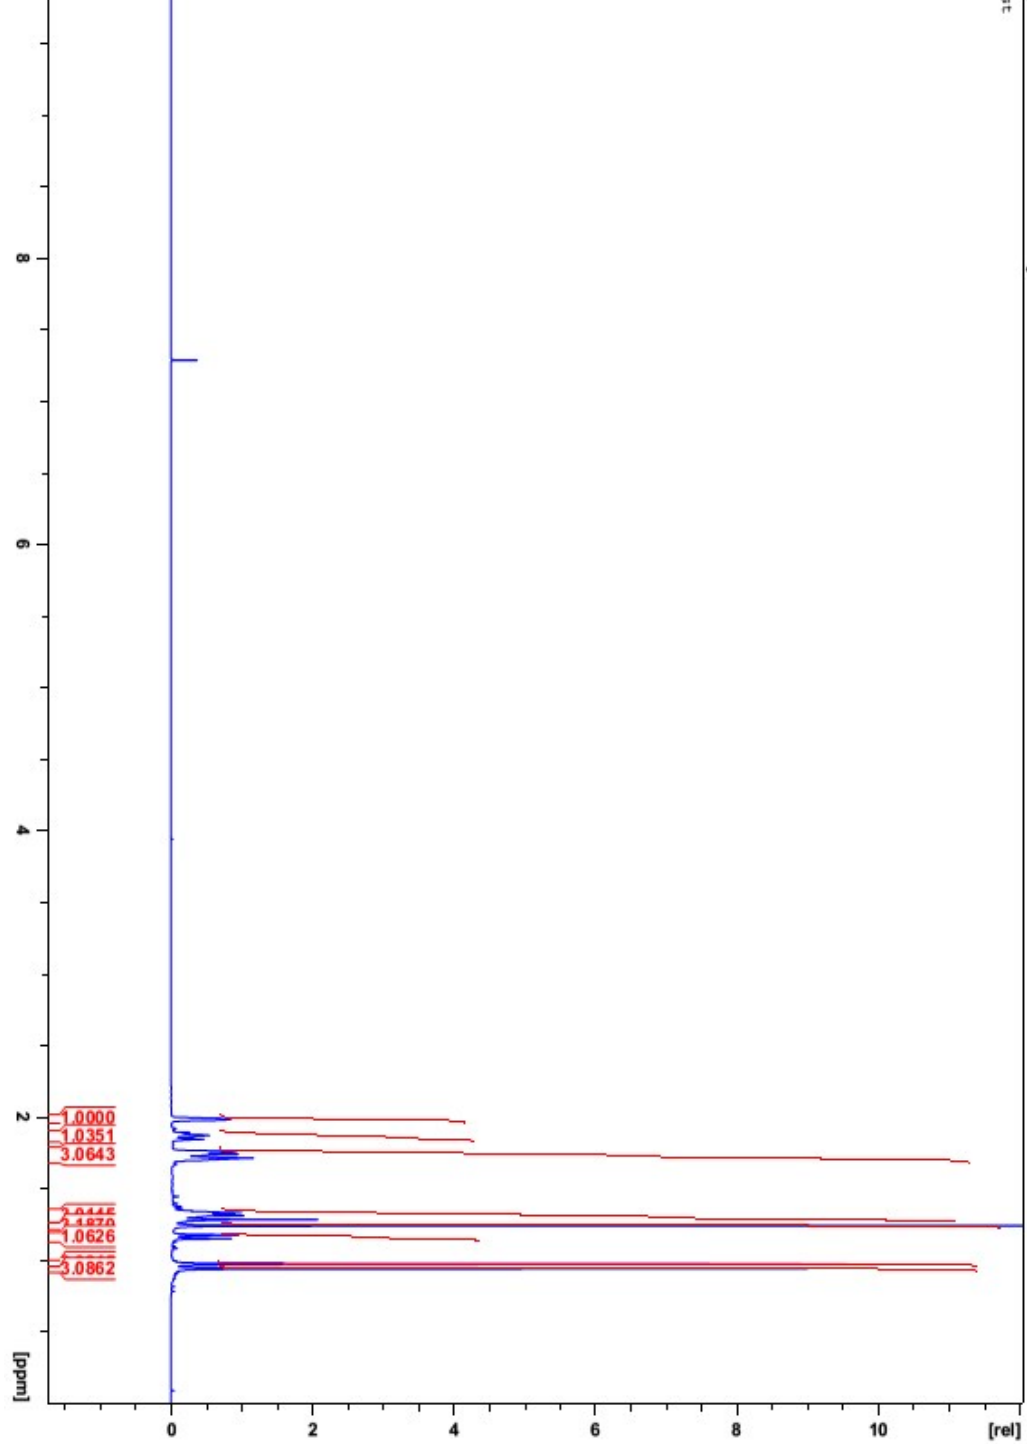

$^{13}\text{C}$  Spectrum of Compound 7

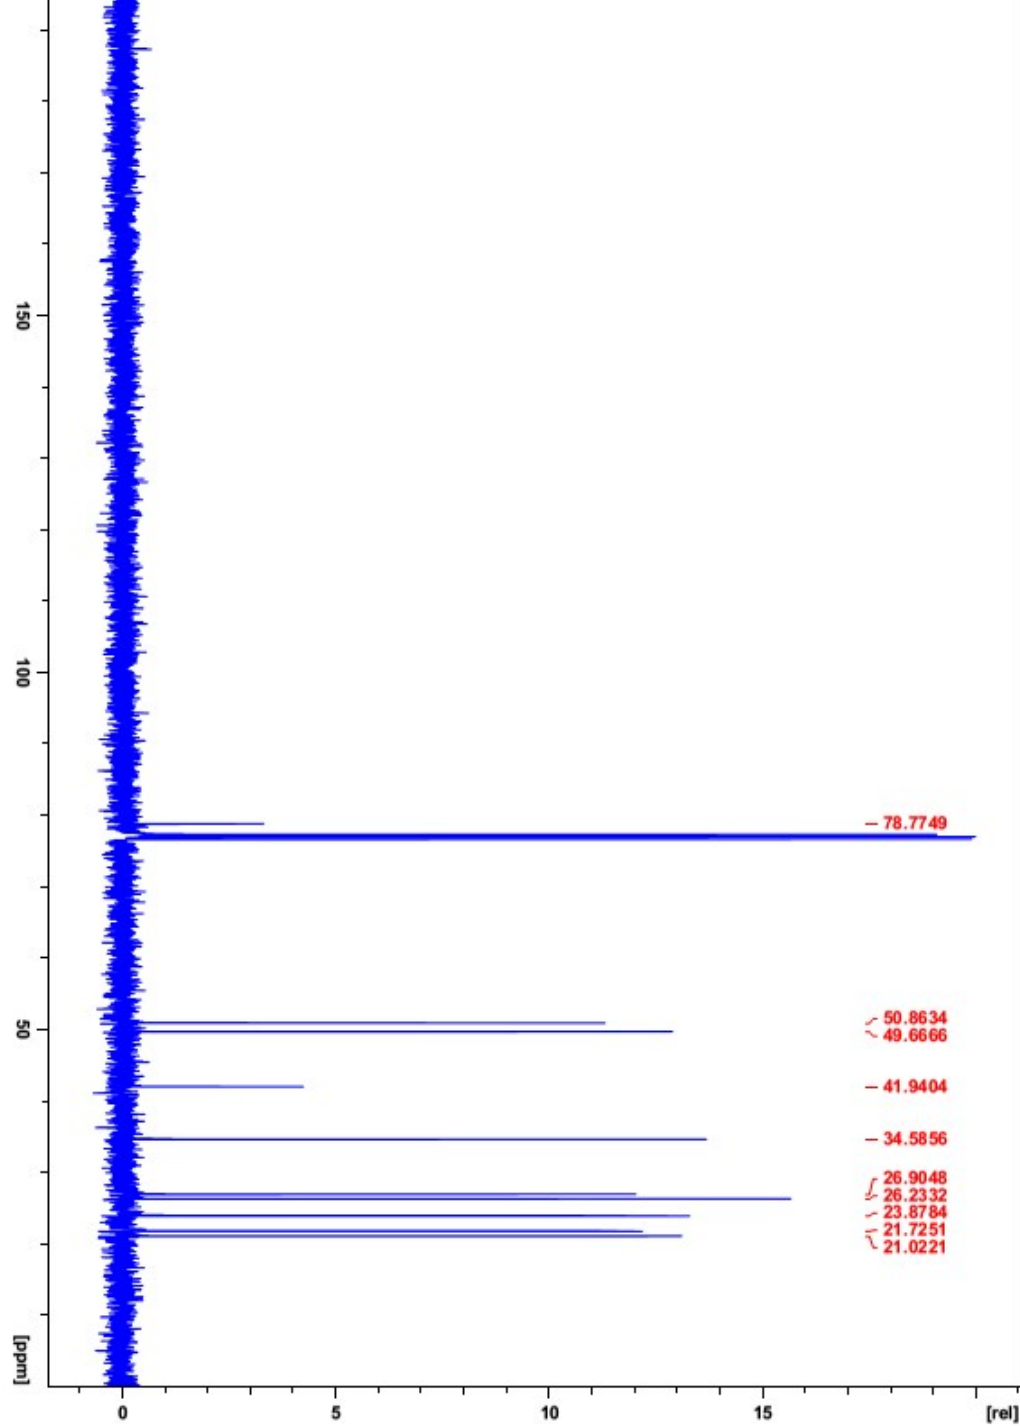

<sup>1</sup>H Spectrum of Compound 8

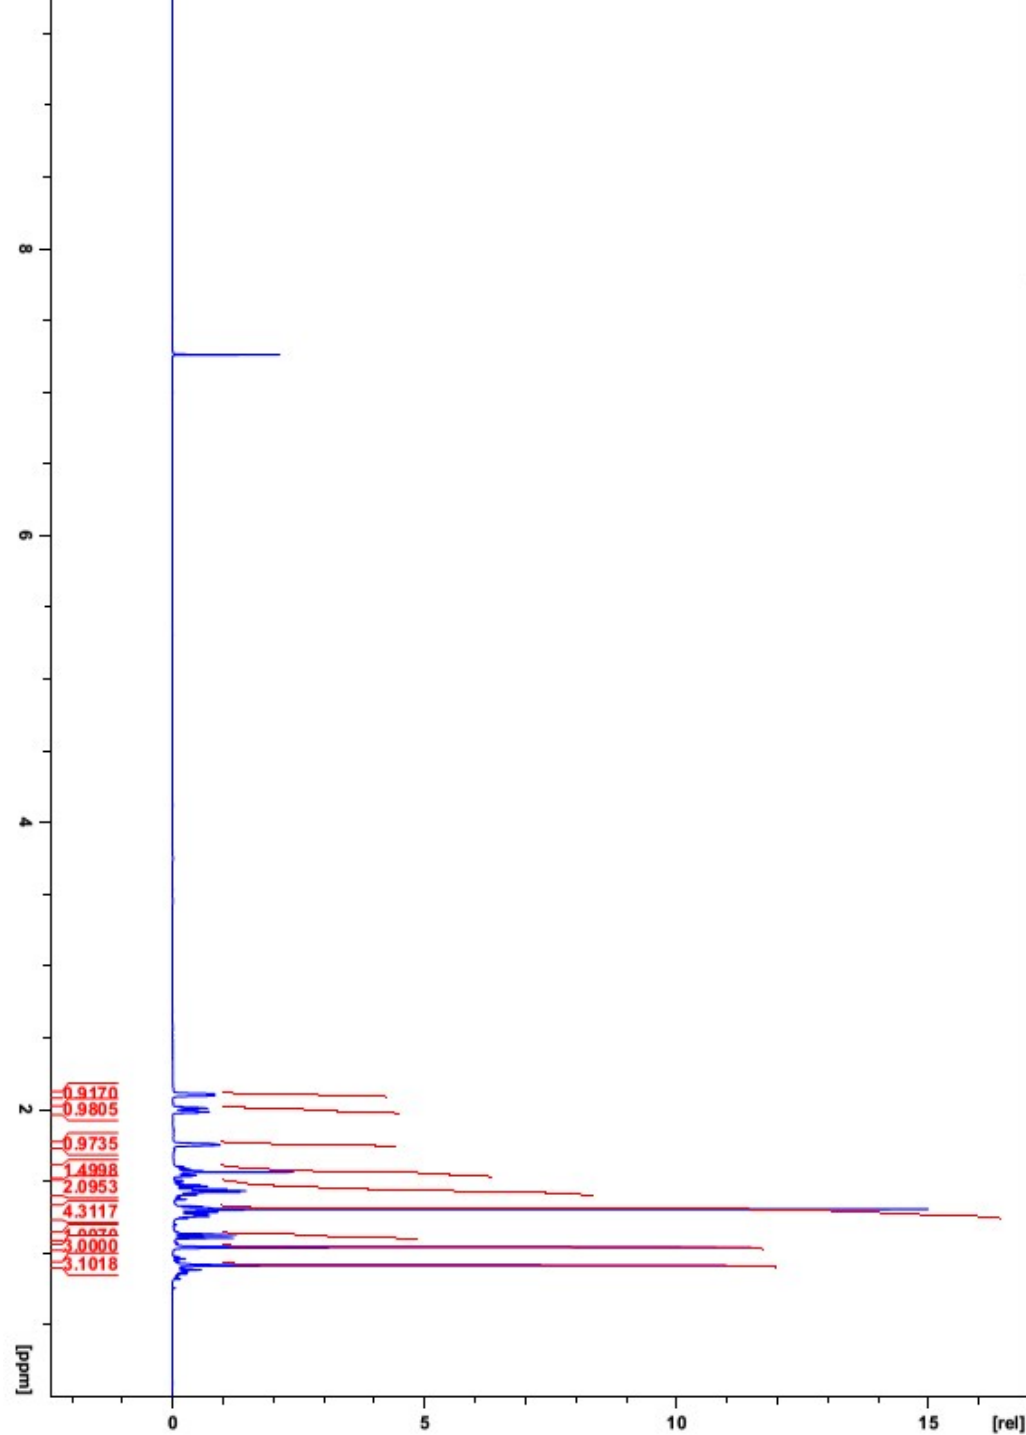

<sup>13</sup>C Spectrum of Compound 8



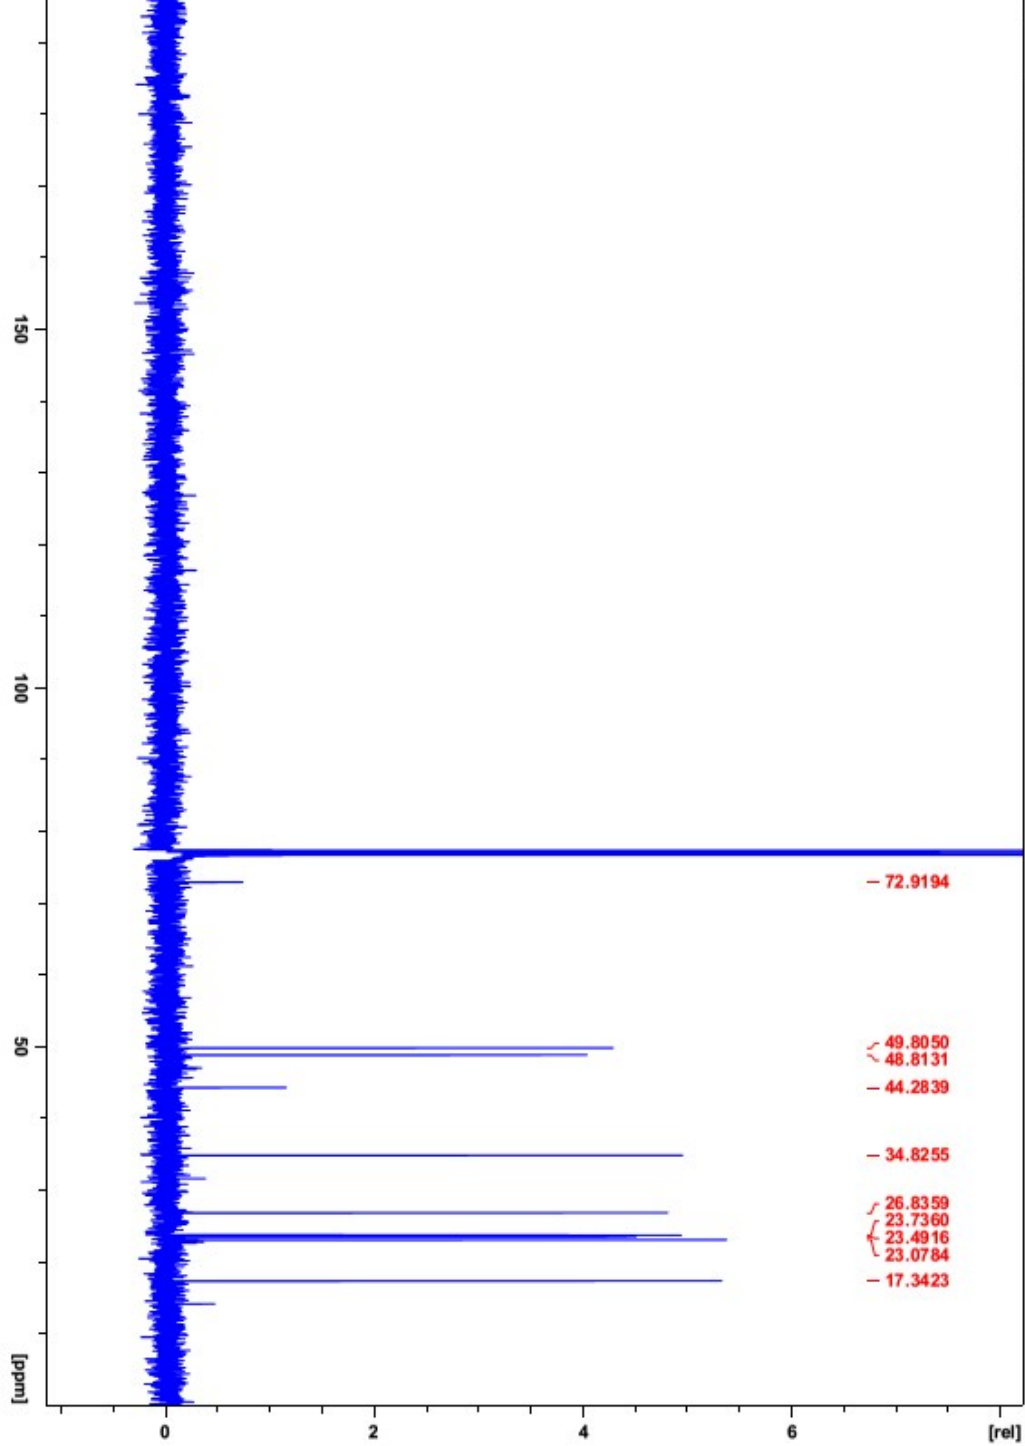

<sup>1</sup>H Spectrum of Compound 14

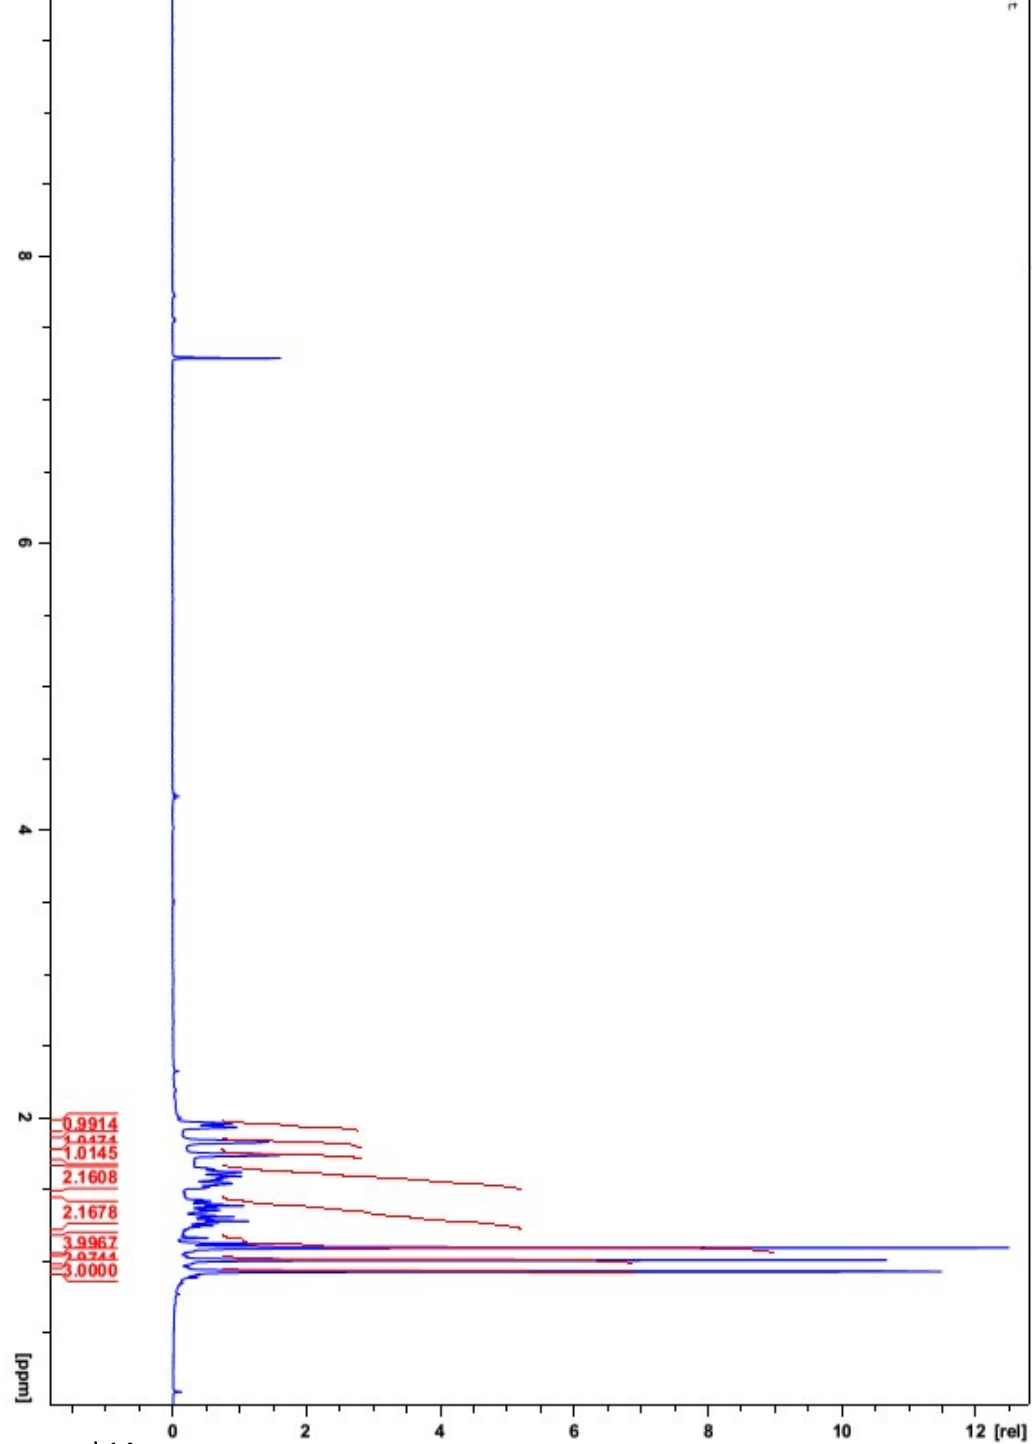

<sup>13</sup>C Spectrum of Compound 14

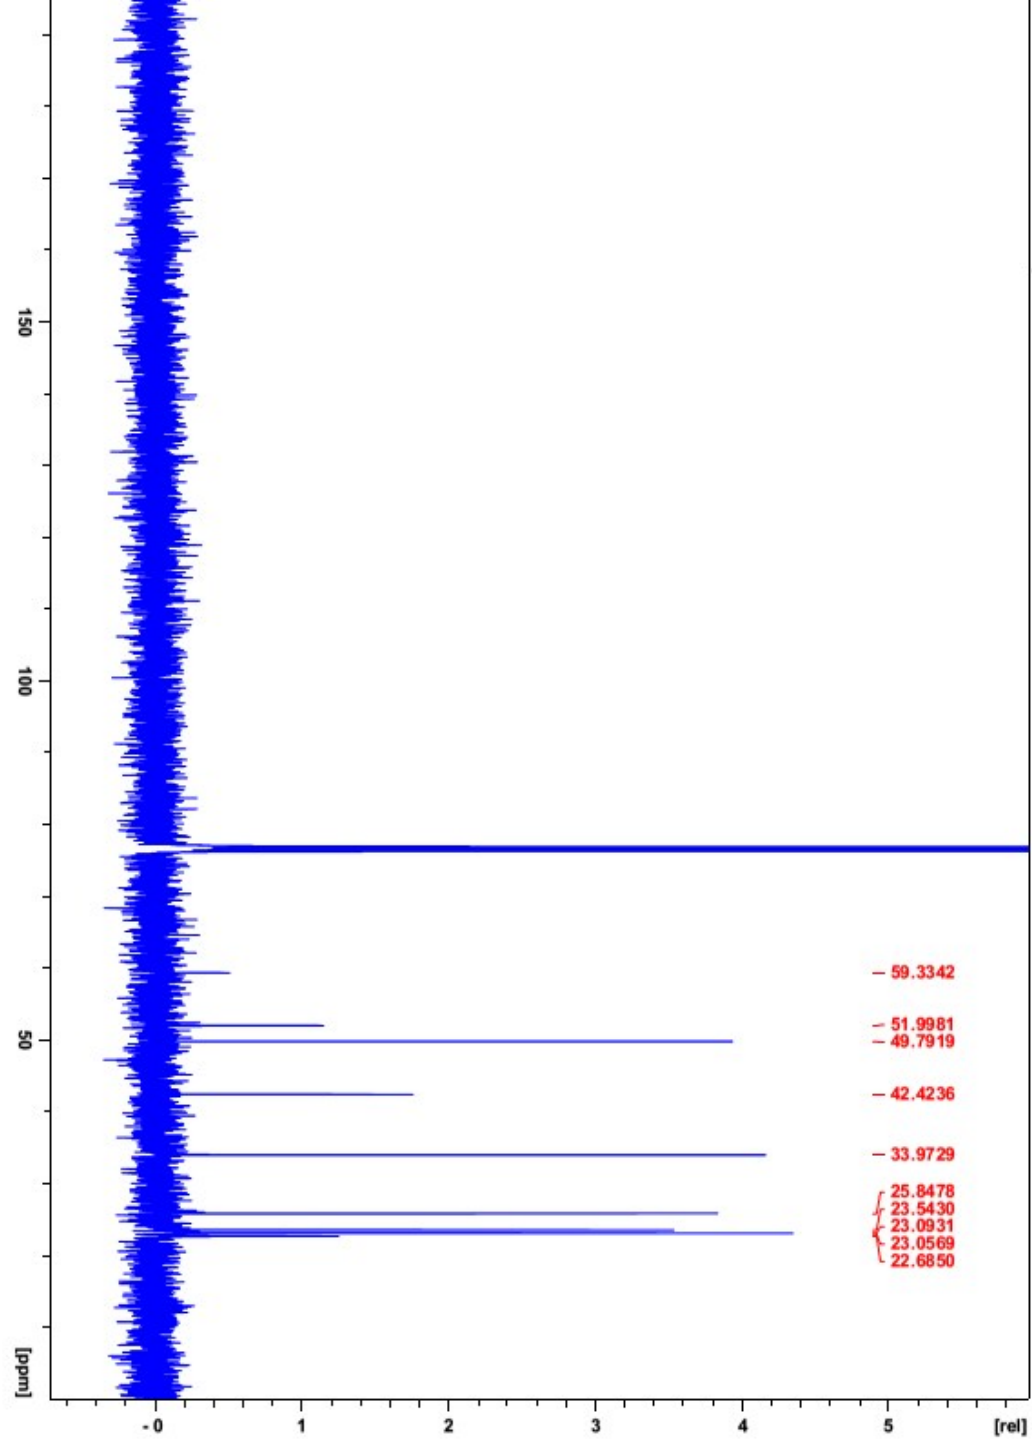

<sup>1</sup>H Spectrum of Compound 17.HCl



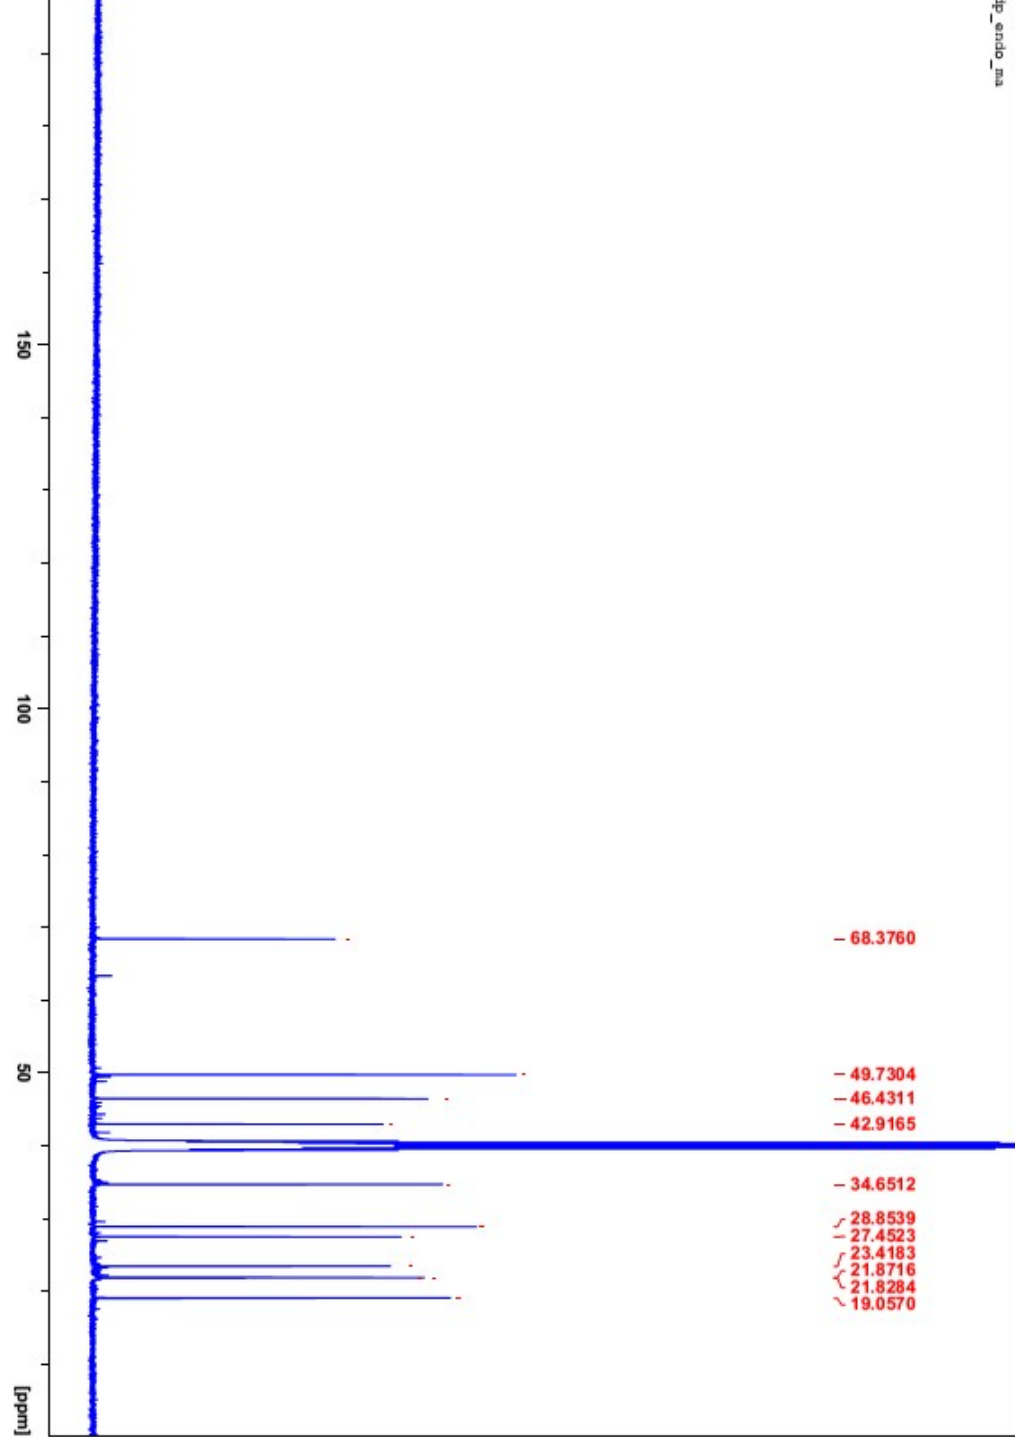

1H Spectrum of Compound 18

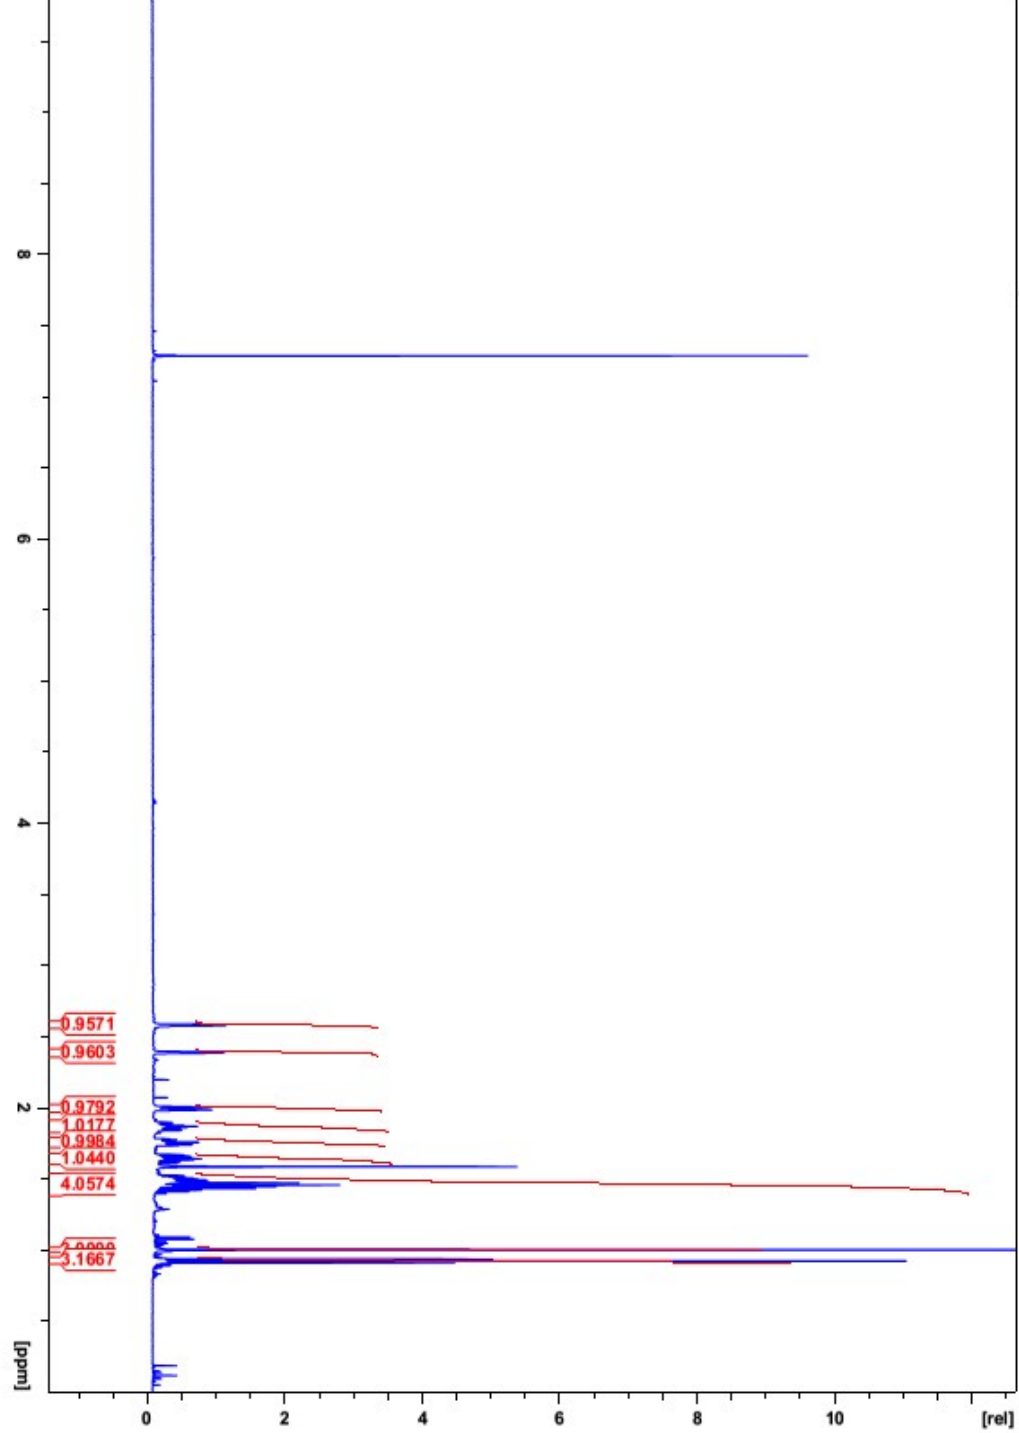

$^{13}\text{C}$  Spectrum of Compound 18

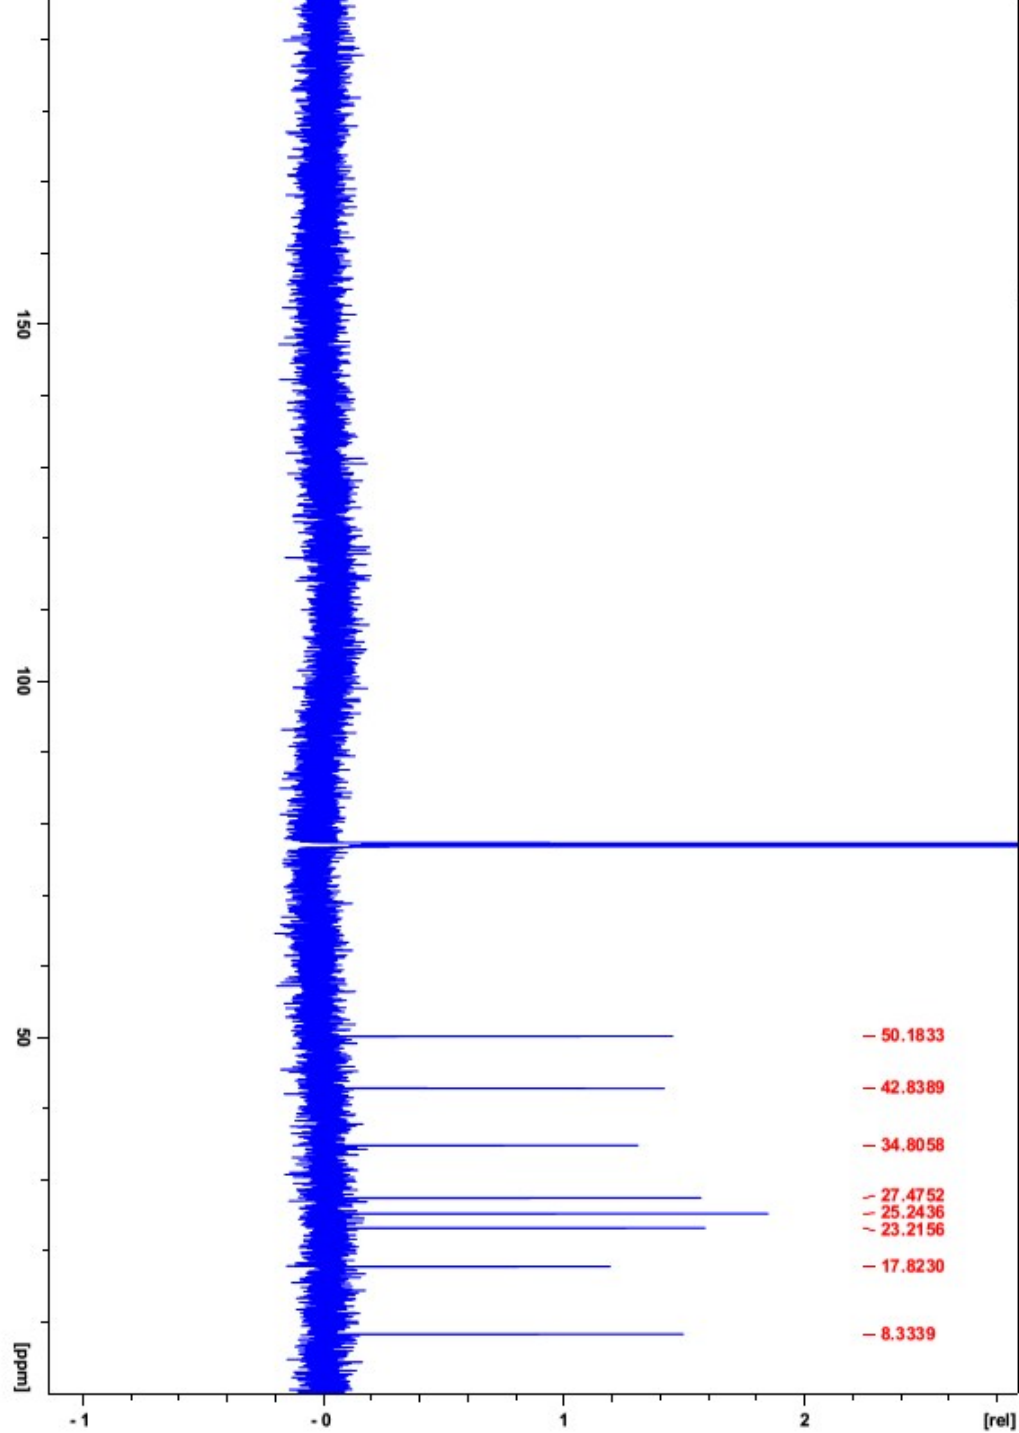

$^1\text{H}$  Spectrum of Compound 19

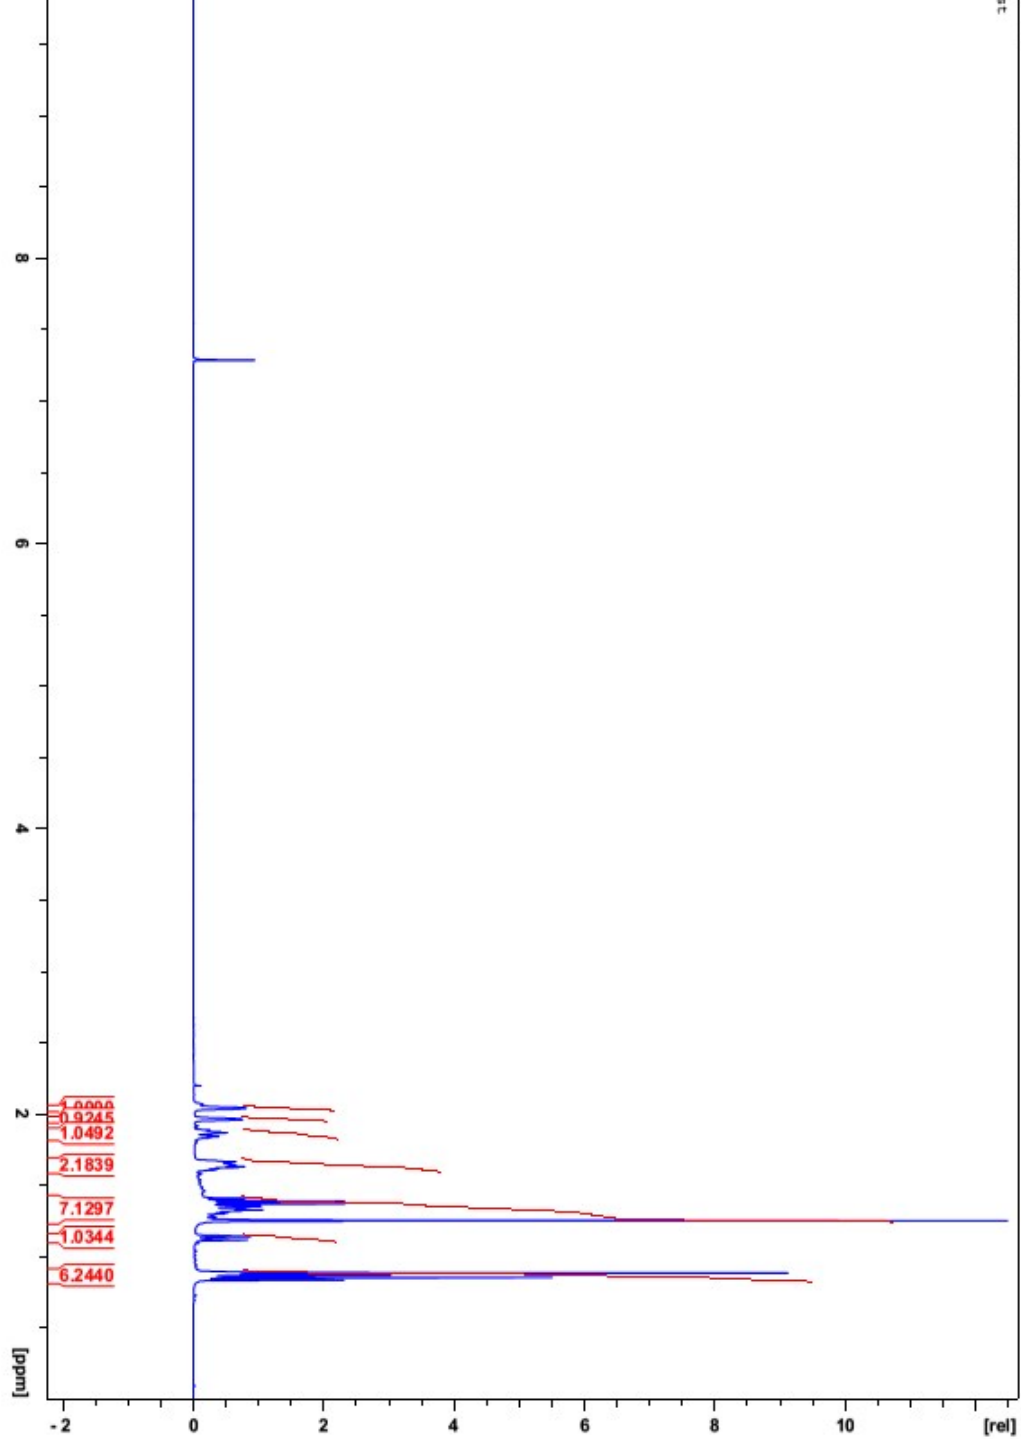

$^{13}\text{C}$  Spectrum of Compound 19



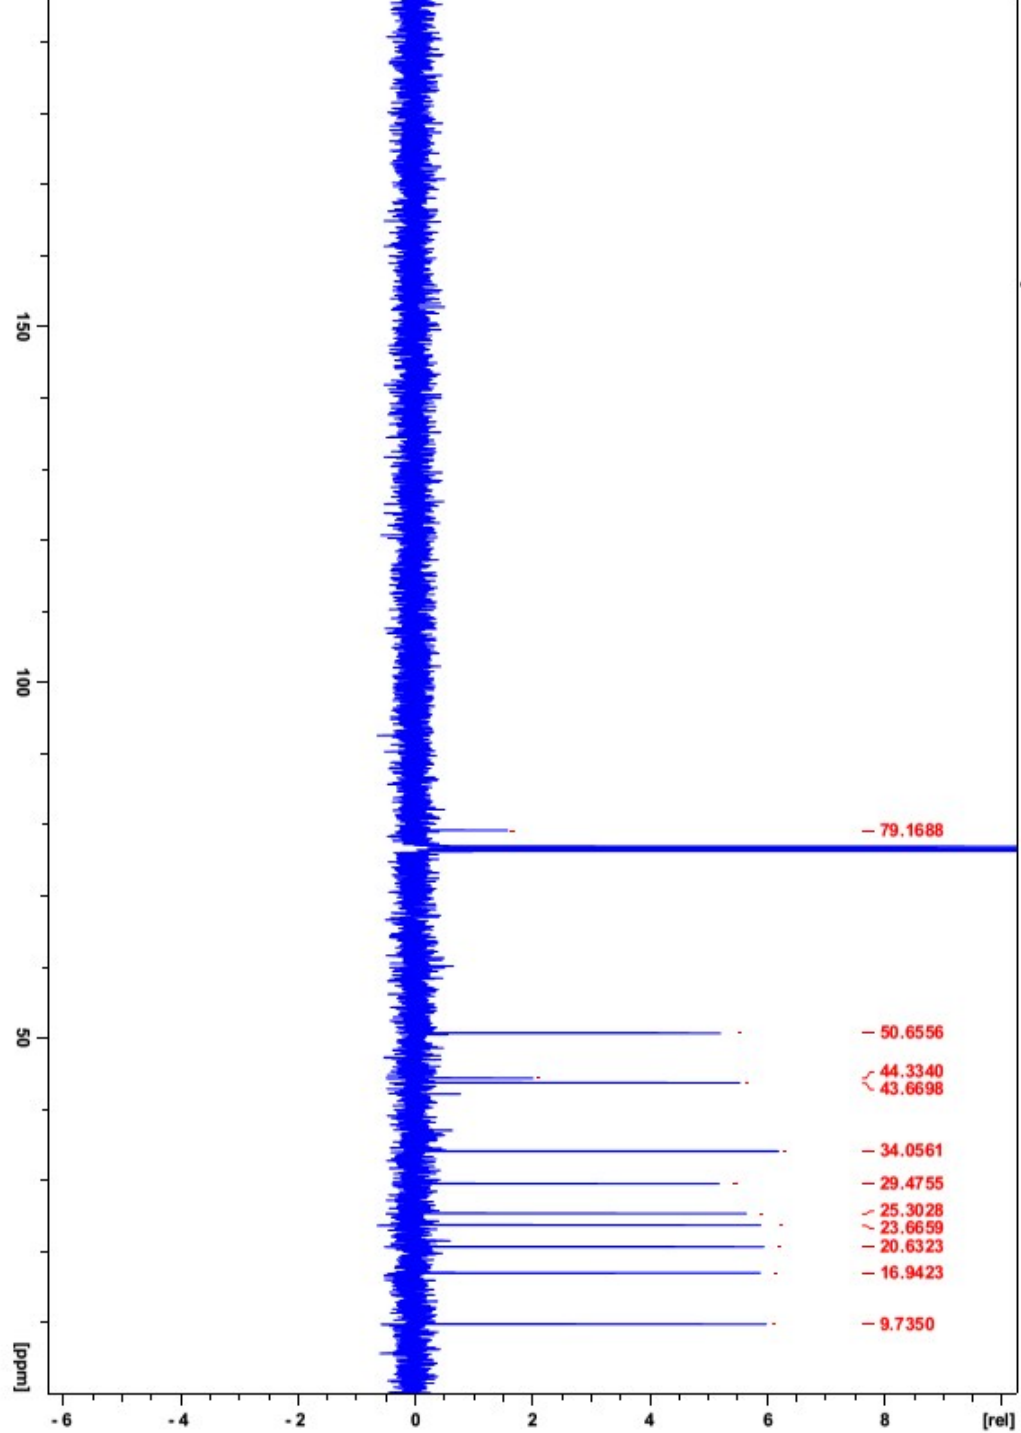

<sup>1</sup>H Spectrum of Compound 20

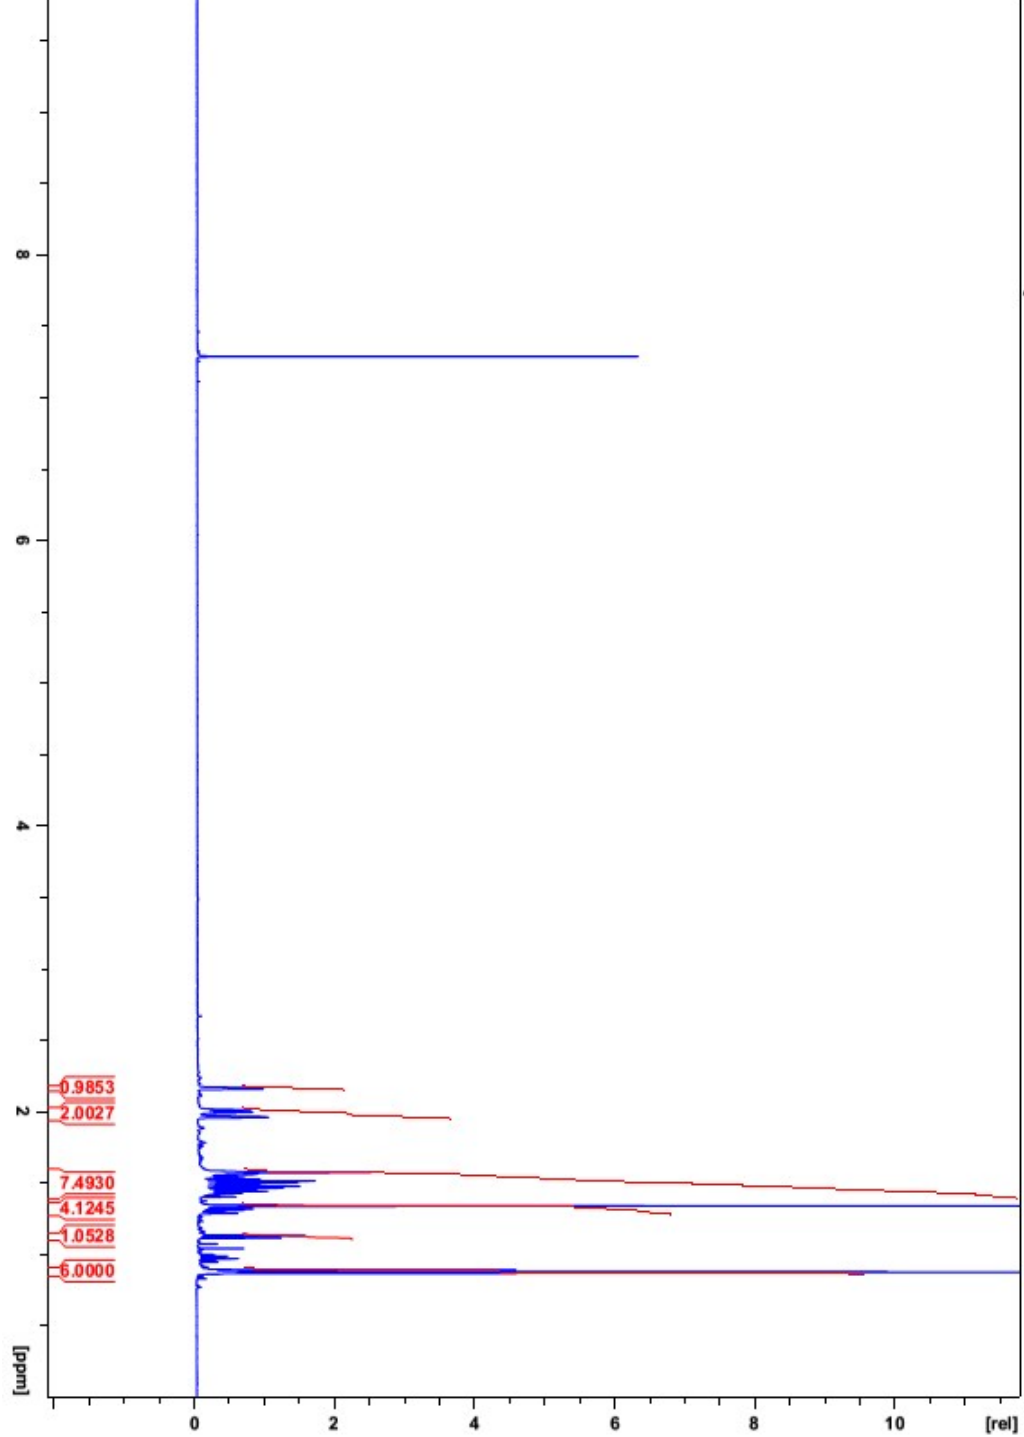

$^{13}\text{C}$  Spectrum of Compound 20

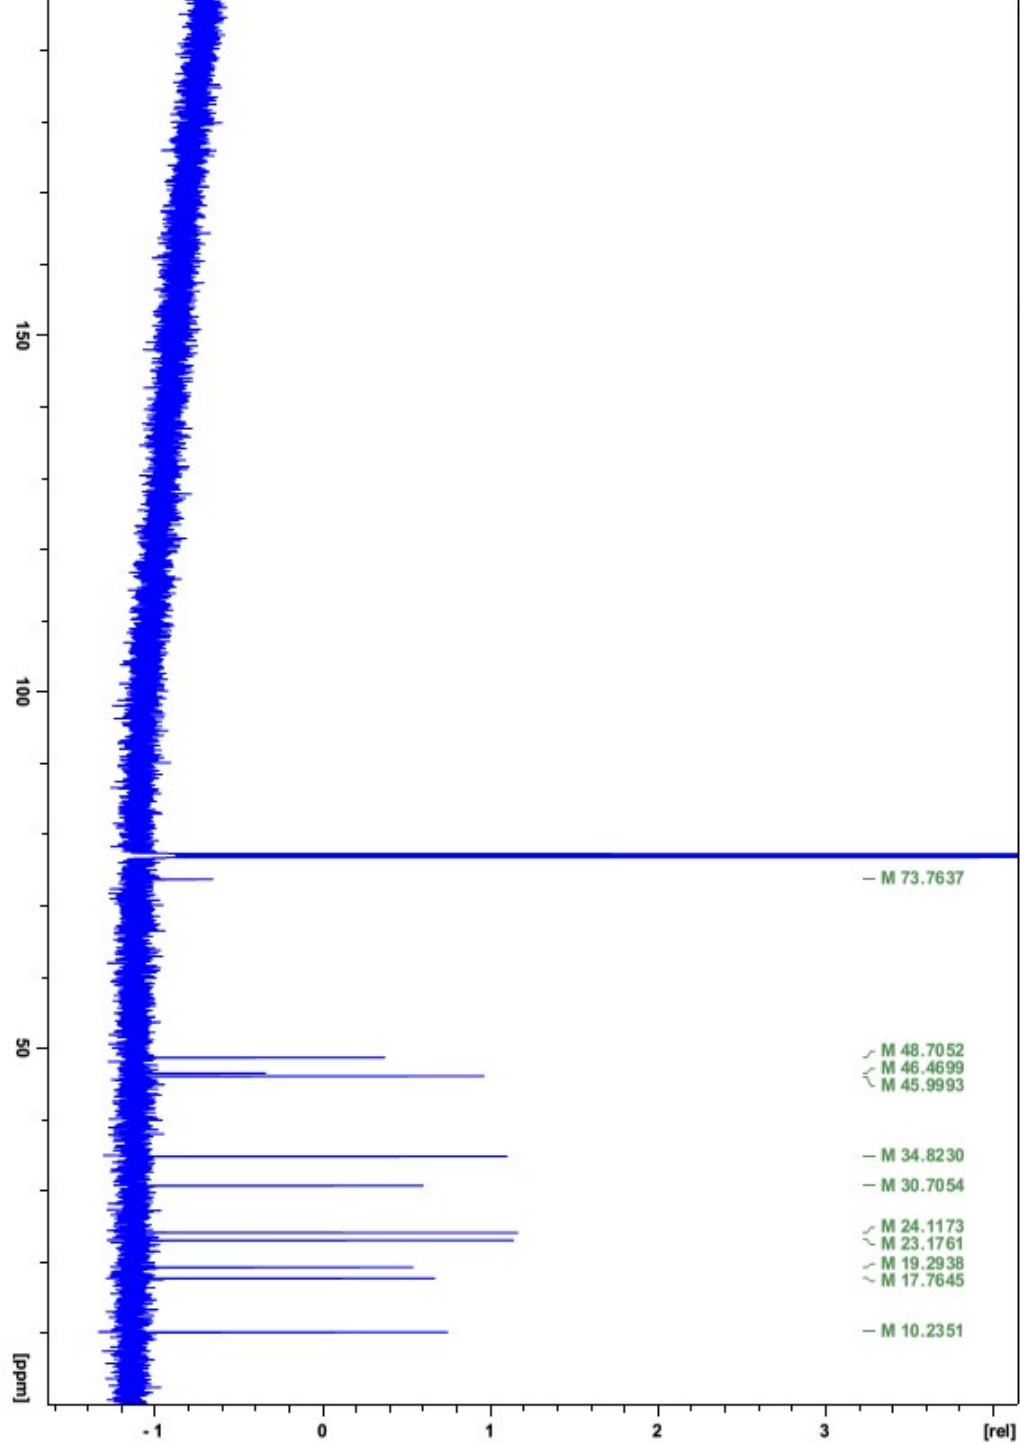

1H Spectrum of Compound 22 + THF

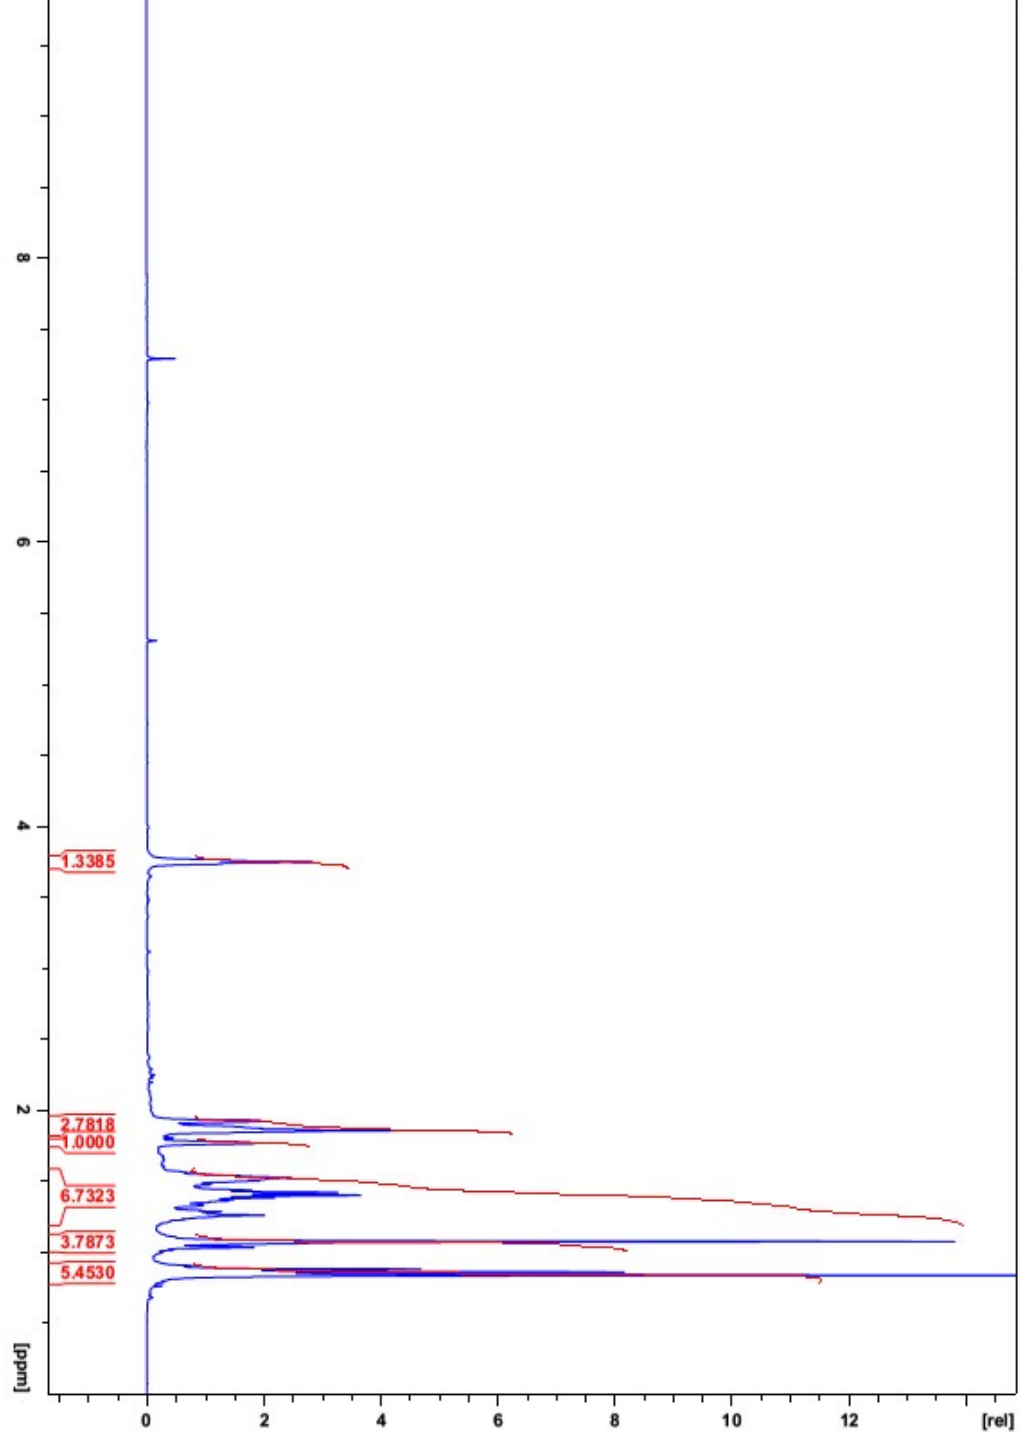

<sup>13</sup>C Spectrum of Compound 22 + THF

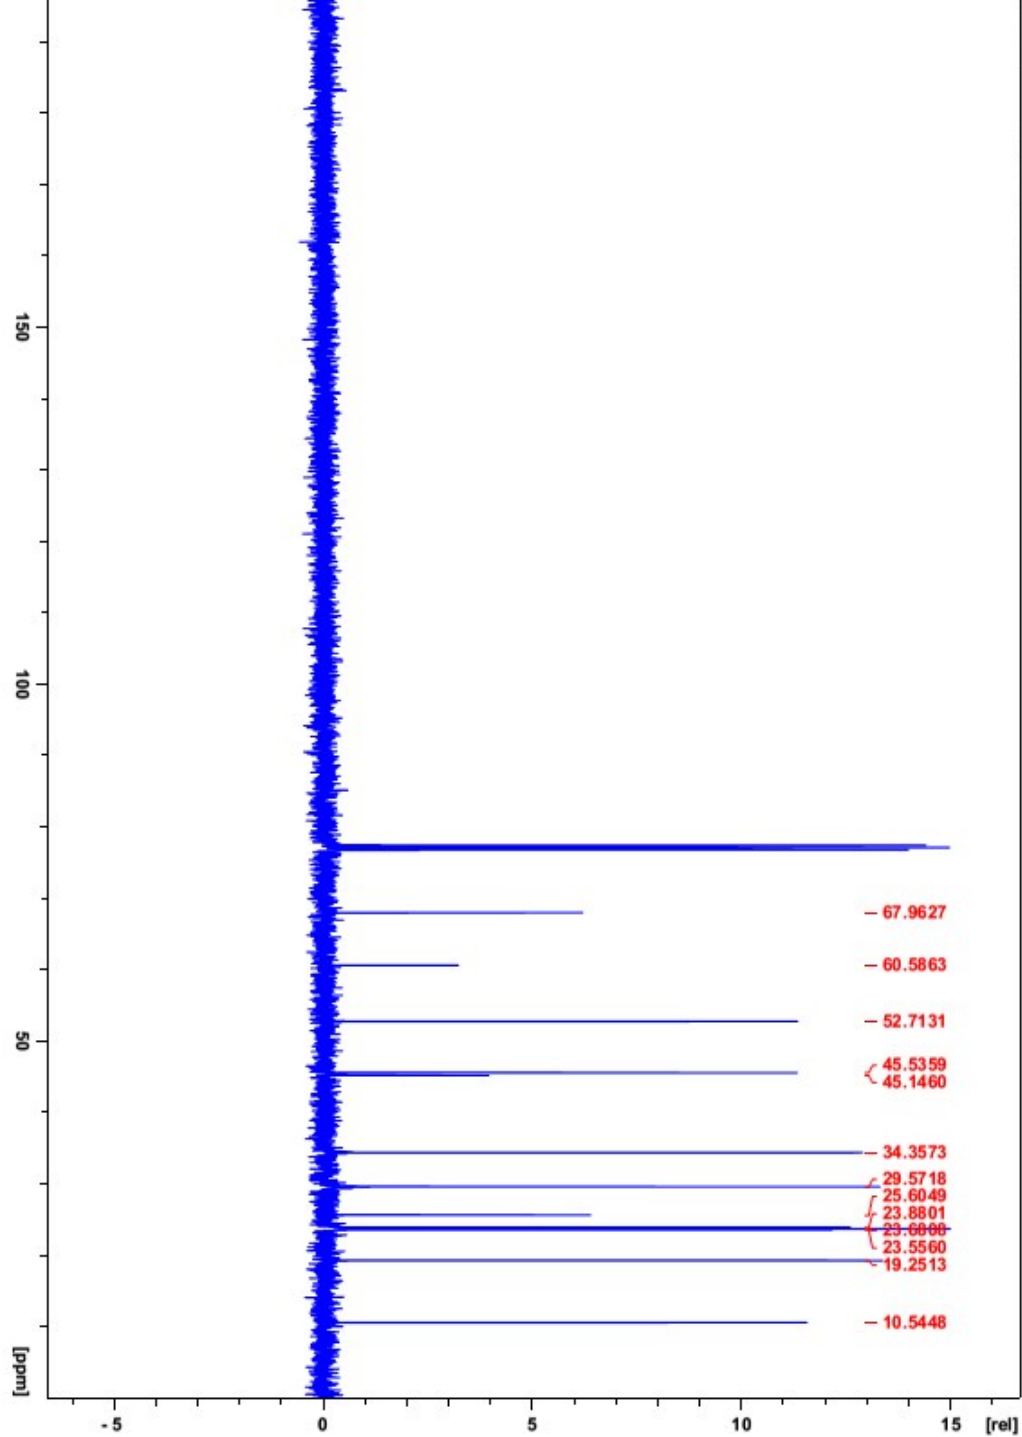

<sup>1</sup>H Spectrum of Compound 24.HCl

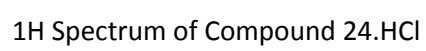

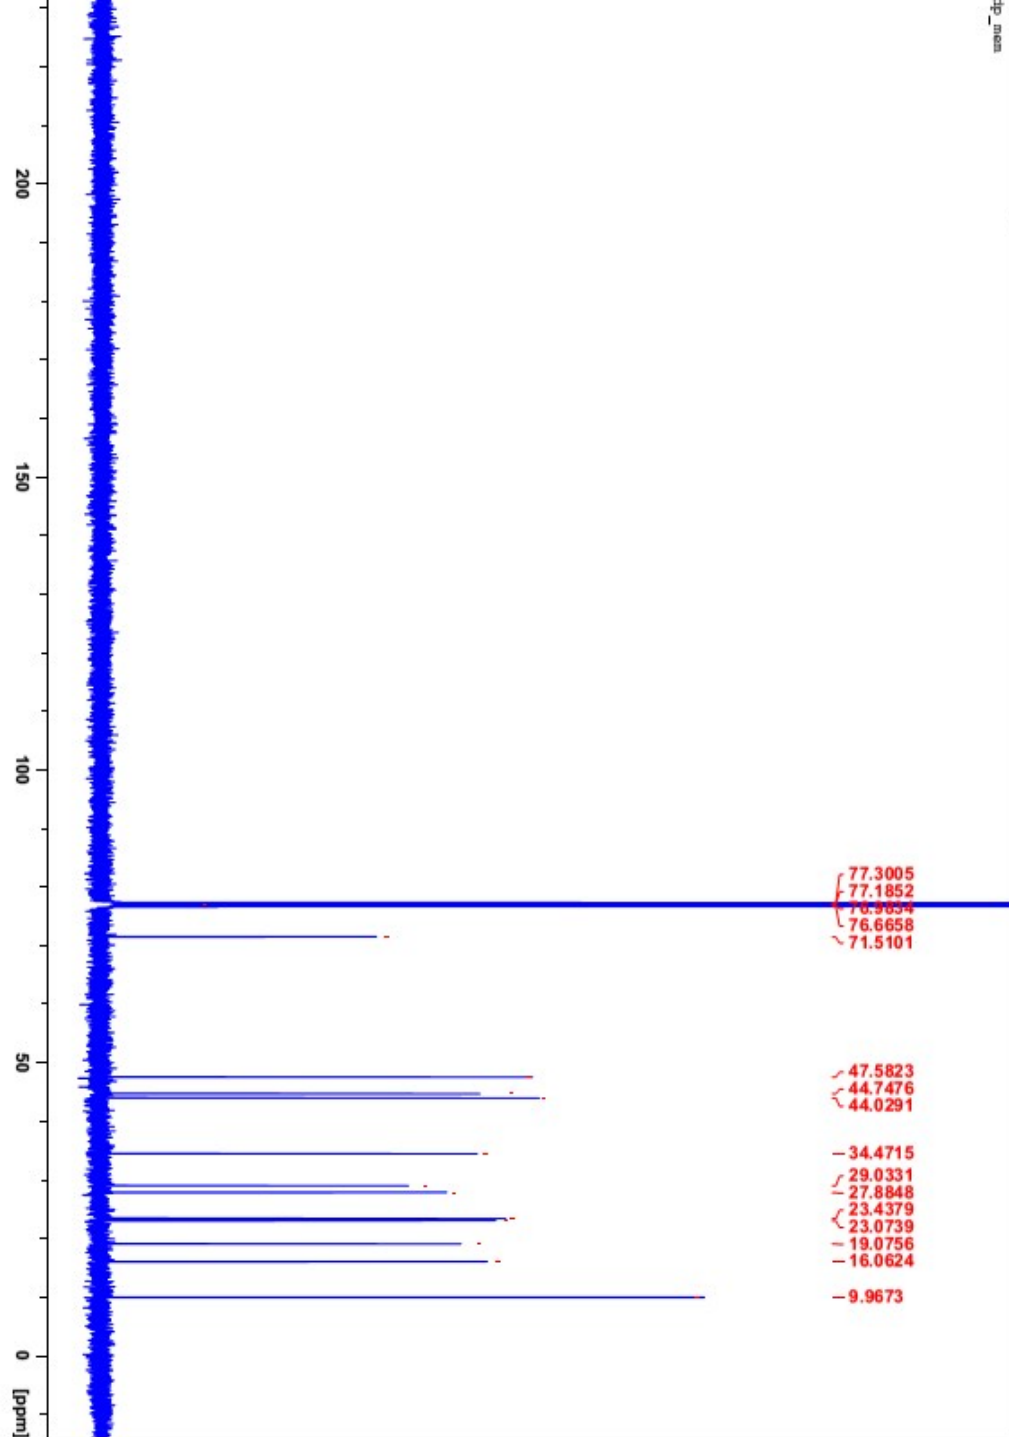

Supplement: c6ob01974a1.pdf [file c6ob01974a1.pdf]
